# Supplementary material
Source: PubMed Central journal article supplement (PMC3935590)
Supplement: ASN.2013050545_ASN2013050545SupplementaryData.pdf [file ASN.2013050545_ASN2013050545SupplementaryData.pdf]

Supplemental Table: Adverse events during the study

| Adverse Event Category   | Occurrences per Aggregate Year<br>(Month 1 to Month 6) |                        |                | P-value <sup>2</sup> |
|--------------------------|--------------------------------------------------------|------------------------|----------------|----------------------|
|                          | Placebo<br>N = 165                                     | ALA & Vit E<br>N = 160 | All<br>N = 325 |                      |
| GI upset                 | 0.73                                                   | 1.27                   | 0.99           | 0.002                |
| infection                | 0.94                                                   | 0.76                   | 0.85           | 0.287                |
| access related           | 0.44                                                   | 0.79                   | 0.61           | 0.011                |
| cardiac                  | 0.47                                                   | 0.53                   | 0.50           | 0.619                |
| other                    | 0.51                                                   | 0.35                   | 0.43           | 0.161                |
| pain                     | 0.45                                                   | 0.38                   | 0.42           | 0.527                |
| pulmonary                | 0.32                                                   | 0.48                   | 0.40           | 0.157                |
| viral infection          | 0.42                                                   | 0.33                   | 0.38           | 0.395                |
| neurological             | 0.20                                                   | 0.18                   | 0.19           | 0.772                |
| hypertension/hypotension | 0.20                                                   | 0.13                   | 0.17           | 0.326                |
| diabetes                 | 0.15                                                   | 0.12                   | 0.13           | 0.637                |
| dizziness                | 0.18                                                   | 0.07                   | 0.12           | 0.092                |
| musculoskeletal          | 0.12                                                   | 0.10                   | 0.11           | 0.762                |
| allergy                  | 0.09                                                   | 0.13                   | 0.11           | 0.446                |
| edema                    | 0.09                                                   | 0.13                   | 0.11           | 0.446                |
| electrolyte disorder     | 0.03                                                   | 0.17                   | 0.09           | 0.025                |
| generalized symptoms     | 0.09                                                   | 0.10                   | 0.09           | 0.829                |
| fluid overload           | 0.15                                                   | 0.02                   | 0.09           | 0.038                |
| anemia                   | 0.03                                                   | 0.10                   | 0.06           | 0.134                |
| trauma                   | 0.06                                                   | 0.07                   | 0.06           | 0.860                |
| eye related              | 0.01                                                   | 0.07                   | 0.04           | 0.177                |
| lesions                  | 0.01                                                   | 0.05                   | 0.03           | 0.290                |
| Overall Rate             | 5.16                                                   | 6.11                   | 5.60           | 0.023                |

<sup>2</sup> Determined using Pearson test
